# Supplementary material
Source: PubMed Central journal article supplement (PMC6764263)
Supplement: bloodBLD2019000795-suppl1.pdf [file bloodBLD2019000795-suppl1.pdf]

**Supplemental Table 1. Significant Adverse Events**

| <b>Event</b>               | <b>CTCAE Grade</b> | <b>Attribution to rituximab</b> |
|----------------------------|--------------------|---------------------------------|
| Lower GI hemorrhage        | 2                  | Unlikely                        |
| Heart failure              | 3                  | Not related                     |
| Line associated bacteremia | 3                  | Possible                        |
| Chest pain                 | 3                  | Unlikely                        |
| Atrial fibrillation        | 3                  | Unlikely                        |
| Hypotension                | 3                  | Unlikely                        |
| Cellulitis                 | 3                  | Unlikely                        |
| Respiratory failure        | 4                  | Probable                        |

**Supplemental Table 2. Reason for exclusion of potential patients**

| <b>Exclusion basis</b>                                           | <b>Number of excluded patients</b> |
|------------------------------------------------------------------|------------------------------------|
| ADAMTS 13 activity > 10%                                         | 12                                 |
| Patient declined participation                                   | 7                                  |
| Current participation in other trials                            | 5                                  |
| Exceeded allowable number of plasma exchange prior to enrollment | 4                                  |
| Diagnosis of cancer                                              | 3                                  |
| Pregnancy                                                        | 3                                  |
| Unable to provide consent                                        | 3                                  |
| Lack of insurance                                                | 3                                  |
| Unable to complete followup at study hospital                    | 3                                  |
| Age < 18                                                         | 2                                  |
| Rituximab within previous year                                   | 2                                  |
| Severe hypertension (SBP >180, DBP>120)                          | 1                                  |
| Congenital TTP                                                   | 1                                  |
| HIV positive                                                     | 1                                  |
| History of Hepatitis B                                           | 1                                  |
| Limited life expectancy                                          | 1                                  |

**Additional ART Investigators:**

Erik Uhlmann

Kenneth A Bauer

Vanetta Worthy

Thomas Bogue
